# Supplementary material for: Diet breadth and exploitation of exotic plants shift the core microbiome of Cephaloleia, a group of tropical herbivorous beetles
Source: PeerJ. 2018 May 17;6:e4793. doi: 10.7717/peerj.4793 (PMC5960584; doi:10.7717/peerj.4793)
Supplement: Supplemental Information 1 — All microbial relative abundance data was calculated from 16S rRNA barcode sequencing results. Heat scales are added for ease of visualization and are consistent among all columns. As is always the case in PCR-based analyses, relative abundance between taxa (i.e., comparing across a row) should be interpreted cautiously. A safer interpretation is the relative abundance of one taxon across multiple samples (i.e., comparing down a column). The full data set contains 274 OTUs, but these top 11 OTUs account for 48% of the total sequences recovered. [file peerj-06-4793-s001.pdf]

**Table S1.** Select key OTUs identified by SIMPER, representing notable taxonomic groups associated with six *Cephaloleia* species (n = 29 adult specimens and 5 eggs) - OTU#s and colors match those on Figure 2. All microbial relative abundance data was calculated from 16S rRNA barcode sequencing results. Heat scales are added for ease of visualization and are consistent among all columns. As is always the case in PCR-based analyses, relative abundance between taxa (i.e., comparing across a row) should be interpreted cautiously. A safer interpretation is the relative abundance of one taxon across multiple samples (i.e., comparing down a column). The full data set contains 274 OTUs, but these top 11 OTUs account for 48% of the total sequences recovered.

|               |                |                  | OTU 131476, 32% of all Pseudomonadales sequences |            |          |          | OTU 218117, 17% of all Pseudomonadales sequences |         |         |         | OTU 28305, 11% of all Pseudomonadales sequences |         |         |        | OTU 126400, 6% of all Pseudomonadales sequences |        |         |         | OTU 79811, 65% of all Enterobacteriales sequences |         |        |         | OTU 127346, 14% of all Enterobacteriales sequences |        |        |        | OTU 104860, 31% of all Burkholderiales sequences |        |        |        | OTU 7980, 63% of all Rickettsiales sequences |         |         |        | OTU 153335, 63% of all Rickettsiales sequences |        |  |  | OTU 57080, 100% of all Entomoplasmatales sequences |  |  |  | OTU 43304, 100% of all Legionellales sequences |  |  |  |
|---------------|----------------|------------------|--------------------------------------------------|------------|----------|----------|--------------------------------------------------|---------|---------|---------|-------------------------------------------------|---------|---------|--------|-------------------------------------------------|--------|---------|---------|---------------------------------------------------|---------|--------|---------|----------------------------------------------------|--------|--------|--------|--------------------------------------------------|--------|--------|--------|----------------------------------------------|---------|---------|--------|------------------------------------------------|--------|--|--|----------------------------------------------------|--|--|--|------------------------------------------------|--|--|--|
|               |                |                  | Bacteria                                         |            |          |          | Bacteria                                         |         |         |         | Bacteria                                        |         |         |        | Bacteria                                        |        |         |         | Bacteria                                          |         |        |         | Bacteria                                           |        |        |        | Bacteria                                         |        |        |        | Bacteria                                     |         |         |        | Bacteria                                       |        |  |  | Bacteria                                           |  |  |  | Bacteria                                       |  |  |  |
|               |                |                  | Phylum                                           |            |          |          | Proteobacteria                                   |         |         |         | Proteobacteria                                  |         |         |        | Proteobacteria                                  |        |         |         | Proteobacteria                                    |         |        |         | Proteobacteria                                     |        |        |        | Proteobacteria                                   |        |        |        | Proteobacteria                               |         |         |        | Proteobacteria                                 |        |  |  | Proteobacteria                                     |  |  |  | Proteobacteria                                 |  |  |  |
|               |                |                  | Class                                            |            |          |          | Gammaproteobacteria                              |         |         |         | Gammaproteobacteria                             |         |         |        | Gammaproteobacteria                             |        |         |         | Gammaproteobacteria                               |         |        |         | Gammaproteobacteria                                |        |        |        | Gammaproteobacteria                              |        |        |        | Gammaproteobacteria                          |         |         |        | Gammaproteobacteria                            |        |  |  | Gammaproteobacteria                                |  |  |  | Gammaproteobacteria                            |  |  |  |
|               |                |                  | Order                                            |            |          |          | Pseudomonadales                                  |         |         |         | Pseudomonadales                                 |         |         |        | Pseudomonadales                                 |        |         |         | Pseudomonadales                                   |         |        |         | Enterobacteriales                                  |        |        |        | Enterobacteriales                                |        |        |        | Enterobacteriales                            |         |         |        | Enterobacteriales                              |        |  |  | Enterobacteriales                                  |  |  |  | Enterobacteriales                              |  |  |  |
|               |                |                  | Family                                           |            |          |          | Moraxellaceae                                    |         |         |         | Moraxellaceae                                   |         |         |        | Moraxellaceae                                   |        |         |         | Pseudomonadaceae                                  |         |        |         | Pseudomonadaceae                                   |        |        |        | Pseudomonadaceae                                 |        |        |        | Pseudomonadaceae                             |         |         |        | Pseudomonadaceae                               |        |  |  | Pseudomonadaceae                                   |  |  |  | Pseudomonadaceae                               |  |  |  |
|               |                |                  | Genus                                            |            |          |          | <i>Acinetobacter</i>                             |         |         |         | <i>Acinetobacter</i>                            |         |         |        | <i>Acinetobacter</i>                            |        |         |         | <i>Acinetobacter</i>                              |         |        |         | <i>Acinetobacter</i>                               |        |        |        | <i>Acinetobacter</i>                             |        |        |        | <i>Acinetobacter</i>                         |         |         |        | <i>Acinetobacter</i>                           |        |  |  | <i>Acinetobacter</i>                               |  |  |  | <i>Acinetobacter</i>                           |  |  |  |
| Plant Type    | Diet Breadth   | Species          | Cb1                                              | 1.0814     |          | 4.7728   |                                                  | 0.1872  |         | 0.0208  |                                                 | 2.2252  |         | 0.1976 |                                                 | 0.5095 |         | 11.8972 |                                                   | 0.0000  |        | 0.0000  |                                                    | 0.0000 |        | 0.0000 |                                                  | 0.0000 |        | 0.0000 |                                              | 0.0000  |         | 0.0000 |                                                | 0.0000 |  |  |                                                    |  |  |  |                                                |  |  |  |
| Generalist    | C. belti       | Cb2              | 0.1005                                           |            | 0.0335   |          | 0.0112                                           |         | 0.0000  |         | 0.1787                                          |         | 0.0112  |        | 0.0000                                          |        | 35.4846 |         | 0.0000                                            |         | 0.0000 |         | 0.0000                                             |        | 0.0000 |        | 0.0000                                           |        | 0.0000 |        | 0.0000                                       |         | 0.0000  |        | 0.0000                                         |        |  |  |                                                    |  |  |  |                                                |  |  |  |
|               |                | Cb3              | 0.2566                                           |            | 0.3894   |          | 0.0619                                           |         | 0.6991  |         | 0.4690                                          |         | 13.5487 |        | 0.0973                                          |        | 28.2566 |         | 0.0000                                            |         | 0.0000 |         | 0.0000                                             |        | 0.0000 |        | 0.0000                                           |        | 0.0000 |        | 0.0000                                       |         | 0.0000  |        | 0.0000                                         |        |  |  |                                                    |  |  |  |                                                |  |  |  |
|               |                | Cb4              | 0.0317                                           |            | 0.0317   |          | 0.0000                                           |         | 0.0000  |         | 0.0952                                          |         | 0.0793  |        | 0.0000                                          |        | 48.6994 |         | 0.0000                                            |         | 0.0000 |         | 0.0000                                             |        | 0.0000 |        | 0.0000                                           |        | 0.0000 |        | 0.0000                                       |         | 0.0000  |        | 0.0000                                         |        |  |  |                                                    |  |  |  |                                                |  |  |  |
|               |                | Cb5              | 0.2966                                           |            | 0.3838   |          | 0.4361                                           |         | 0.0000  |         | 0.3140                                          |         | 0.2094  |        | 0.0872                                          |        | 0.0000  |         | 0.0000                                            |         | 0.0000 |         | 0.0000                                             |        | 0.0000 |        | 0.0000                                           |        | 0.0000 |        | 0.0000                                       |         | 0.0000  |        | 0.0000                                         |        |  |  |                                                    |  |  |  |                                                |  |  |  |
|               |                | Cb6              | 0.0254                                           |            | 0.0000   |          | 0.2715                                           |         | 0.0170  |         | 0.2036                                          |         | 0.0933  |        | 0.0000                                          |        | 2.1038  |         | 0.0000                                            |         | 0.0000 |         | 0.0000                                             |        | 0.0000 |        | 0.0000                                           |        | 0.0000 |        | 8.4917                                       |         | 11.3379 |        |                                                |        |  |  |                                                    |  |  |  |                                                |  |  |  |
|               |                | Cb7              | 4.0476                                           |            | 0.2086   |          | 3.2130                                           |         | 0.0313  |         | 1.6274                                          |         | 0.4486  |        | 0.0417                                          |        | 0.0104  |         | 14.8237                                           |         | 0.0000 |         | 0.0000                                             |        | 0.0000 |        | 0.0000                                           |        | 0.0000 |        | 0.0000                                       |         | 0.4381  |        | 0.0000                                         |        |  |  |                                                    |  |  |  |                                                |  |  |  |
|               |                | Cb8              | 0.8086                                           |            | 1.0337   |          | 4.1931                                           |         | 1.5839  |         | 1.1337                                          |         | 0.0333  |        | 0.1417                                          |        | 0.0417  |         | 0.0000                                            |         | 0.0000 |         | 0.0000                                             |        | 0.0000 |        | 0.0000                                           |        | 0.0000 |        | 0.9170                                       |         | 14.1047 |        |                                                |        |  |  |                                                    |  |  |  |                                                |  |  |  |
|               |                | Cr1              | 4.0858                                           |            | 0.0311   |          | 0.0000                                           |         | 0.0000  |         | 0.0000                                          |         | 3.8217  |        | 0.0000                                          |        | 0.0466  |         | 27.6681                                           |         | 0.0000 |         | 0.0000                                             |        | 0.0000 |        | 0.0000                                           |        | 0.0000 |        | 0.0000                                       |         | 0.0000  |        | 0.0000                                         |        |  |  |                                                    |  |  |  |                                                |  |  |  |
|               | Native         | C. reventazonica | Cr2                                              | 0.4431     |          | 0.0000   |                                                  | 0.4009  |         | 0.0000  |                                                 | 0.0211  |         | 0.0000 |                                                 | 0.0000 |         | 0.0000  |                                                   | 0.0000  |        | 0.0000  |                                                    | 0.0000 |        | 0.0000 |                                                  | 0.0000 |        | 0.0000 |                                              | 15.1851 |         | 0.0000 |                                                |        |  |  |                                                    |  |  |  |                                                |  |  |  |
|               |                |                  | Cr3                                              | 1.0422     |          | 0.0183   |                                                  | 0.0183  |         | 0.0000  |                                                 | 0.4023  |         | 0.4937 |                                                 | 0.0000 |         | 0.0183  |                                                   | 14.2805 |        | 0.0000  |                                                    | 0.0000 |        | 0.0000 |                                                  | 0.0000 |        | 0.0000 |                                              | 0.0000  |         | 0.0000 |                                                |        |  |  |                                                    |  |  |  |                                                |  |  |  |
| C. fenestrata |                | Cr1              | 3.9437                                           |            | 0.9165   |          | 4.3881                                           |         | 0.1296  |         | 19.1261                                         |         | 1.8052  |        | 0.2222                                          |        | 0.0000  |         | 0.0000                                            |         | 0.0000 |         | 0.0000                                             |        | 0.0000 |        | 0.0000                                           |        | 0.0000 |        | 0.0000                                       |         | 0.0000  |        |                                                |        |  |  |                                                    |  |  |  |                                                |  |  |  |
|               |                | Cr2              | 3.5294                                           |            | 0.7843   |          | 2.5403                                           |         | 0.1783  |         | 7.4025                                          |         | 2.3529  |        | 0.1159                                          |        | 0.0000  |         | 0.0178                                            |         | 0.0000 |         | 0.0000                                             |        | 0.0000 |        | 0.0000                                           |        | 0.0000 |        | 0.0000                                       |         | 0.0000  |        |                                                |        |  |  |                                                    |  |  |  |                                                |  |  |  |
|               |                | Cr3              | 0.1083                                           |            | 0.0722   |          | 3.8503                                           |         | 0.4813  |         | 15.2930                                         |         | 21.3332 |        | 0.1203                                          |        | 0.0000  |         | 0.0000                                            |         | 0.0000 |         | 0.0000                                             |        | 0.0000 |        | 0.0000                                           |        | 0.0000 |        | 0.0120                                       |         | 0.0000  |        |                                                |        |  |  |                                                    |  |  |  |                                                |  |  |  |
|               |                | Cr4              | 0.0335                                           |            | 1.5757   |          | 10.2405                                          |         | 8.9682  |         | 5.5989                                          |         | 3.0676  |        | 0.4191                                          |        | 0.0000  |         | 0.0251                                            |         | 0.0000 |         | 0.0000                                             |        | 0.0000 |        | 0.0000                                           |        | 0.0000 |        | 0.0000                                       |         | 0.0000  |        |                                                |        |  |  |                                                    |  |  |  |                                                |  |  |  |
|               |                | Cr5              | 0.3041                                           |            | 5.8102   |          | 2.4652                                           |         | 1.9222  |         | 5.1260                                          |         | 1.3901  |        | 0.1738                                          |        | 0.0000  |         | 0.0000                                            |         | 0.0000 |         | 0.0000                                             |        | 0.0000 |        | 0.0000                                           |        | 0.0000 |        | 0.0000                                       |         | 0.0000  |        |                                                |        |  |  |                                                    |  |  |  |                                                |  |  |  |
|               |                | Cr6              | 0.9935                                           |            | 1.0266   |          | 17.7834                                          |         | 1.8876  |         | 1.1591                                          |         | 0.2870  |        | 0.4415                                          |        | 0.0000  |         | 4.5259                                            |         | 0.0000 |         | 0.0000                                             |        | 0.0000 |        | 0.0000                                           |        | 0.0000 |        | 0.0110                                       |         | 0.0000  |        |                                                |        |  |  |                                                    |  |  |  |                                                |  |  |  |
|               |                | Cr7              | 0.1254                                           |            | 1.5764   |          | 0.0717                                           |         | 0.0896  |         | 39.3820                                         |         | 0.0627  |        | 0.0179                                          |        | 0.0000  |         | 4.7559                                            |         | 0.6986 |         | 0.0358                                             |        | 0.0000 |        | 0.0000                                           |        | 0.0000 |        | 0.0000                                       |         | 0.0000  |        |                                                |        |  |  |                                                    |  |  |  |                                                |  |  |  |
|               |                | C. dilatocolis   | Cd1                                              | 18.8271    |          | 8.9269   |                                                  | 1.0991  |         | 6.2254  |                                                 | 39.6929 |         | 0.3188 |                                                 | 1.7116 |         | 0.0084  |                                                   | 0.0000  |        | 0.1594  |                                                    | 0.0000 |        | 0.0000 |                                                  | 0.0000 |        | 0.0000 |                                              | 0.0000  |         | 0.0000 |                                                |        |  |  |                                                    |  |  |  |                                                |  |  |  |
| Cd2           | 27.5692        |                  |                                                  | 5.9286     |          | 1.1289   |                                                  | 8.9556  |         | 27.9204 |                                                 | 2.4417  |         | 2.0988 |                                                 | 0.0000 |         | 0.0000  |                                                   | 0.0836  |        | 0.0000  |                                                    | 0.0000 |        | 0.0000 |                                                  | 0.0000 |        | 0.0000 |                                              | 0.0000  |         |        |                                                |        |  |  |                                                    |  |  |  |                                                |  |  |  |
| Specialist    | C. dorsalis    | Cd3              | 9.5132                                           |            | 3.4945   |          | 3.4945                                           |         | 0.8586  |         | 2.3839                                          |         | 0.7470  |        | 0.8460                                          |        | 0.0172  |         | 0.0000                                            |         | 0.0604 |         | 0.0000                                             |        | 0.0000 |        | 0.0000                                           |        | 0.0000 |        | 0.0000                                       |         | 0.0000  |        |                                                |        |  |  |                                                    |  |  |  |                                                |  |  |  |
|               |                | Cd1              | 0.0174                                           |            | 34.4078  |          | 1.1640                                           |         | 0.8947  |         | 8.8992                                          |         | 2.0413  |        | 2.5017                                          |        | 0.0521  |         | 0.0000                                            |         | 0.4083 |         | 0.0000                                             |        | 0.0000 |        | 0.0000                                           |        | 0.0000 |        | 0.0000                                       |         | 0.0000  |        |                                                |        |  |  |                                                    |  |  |  |                                                |  |  |  |
|               |                | Cd2              | 0.0926                                           |            | 6.4019   |          | 2.1996                                           |         | 1.0882  |         | 5.4874                                          |         | 0.4052  |        | 1.7944                                          |        | 0.0000  |         | 24.0912                                           |         | 0.0000 |         | 0.0000                                             |        | 0.0000 |        | 0.0000                                           |        | 0.0000 |        | 0.0000                                       |         | 0.0000  |        |                                                |        |  |  |                                                    |  |  |  |                                                |  |  |  |
|               |                | Cd3              | 0.4057                                           |            | 0.2525   |          | 0.3607                                           |         | 0.2615  |         | 21.1523                                         |         | 0.0451  |        | 2.4254                                          |        | 0.0000  |         | 16.7119                                           |         | 0.0000 |         | 0.0000                                             |        | 0.0000 |        | 0.0000                                           |        | 0.0000 |        | 0.0000                                       |         | 0.0000  |        |                                                |        |  |  |                                                    |  |  |  |                                                |  |  |  |
|               |                | Cp1              | 27.5522                                          |            | 2.4269   |          | 3.5491                                           |         | 2.4269  |         | 3.3765                                          |         | 0.0435  |        | 6.3065                                          |        | 0.0000  |         | 0.0087                                            |         | 0.0000 |         | 0.0000                                             |        | 0.0000 |        | 0.0000                                           |        | 0.0000 |        | 0.0000                                       |         | 0.0000  |        |                                                |        |  |  |                                                    |  |  |  |                                                |  |  |  |
|               |                | Cp2              | 13.4104                                          |            | 0.2914   |          | 0.6580                                           |         | 1.6074  |         | 2.4629                                          |         | 2.1527  |        | 0.8460                                          |        | 0.0094  |         | 0.0188                                            |         | 0.0000 |         | 0.0000                                             |        | 0.0000 |        | 0.0000                                           |        | 0.0000 |        | 0.0000                                       |         | 0.0000  |        |                                                |        |  |  |                                                    |  |  |  |                                                |  |  |  |
|               |                | Cp3              | 3.5104                                           |            | 12.6863  |          | 1.8015                                           |         | 0.3620  |         | 0.4714                                          |         | 0.4209  |        | 0.2778                                          |        | 0.0000  |         | 0.0000                                            |         | 0.0000 |         | 0.0000                                             |        | 0.0000 |        | 0.0000                                           |        | 0.0000 |        | 0.0000                                       |         | 0.0000  |        |                                                |        |  |  |                                                    |  |  |  |                                                |  |  |  |
|               |                | Cp4              | 11.1617                                          |            | 0.1778   |          | 2.3198                                           |         | 0.8444  |         | 1.2799                                          |         | 0.5066  |        | 0.4000                                          |        | 0.0178  |         | 0.0000                                            |         | 0.0000 |         | 0.0000                                             |        | 0.0000 |        | 0.0000                                           |        | 0.0000 |        | 0.0000                                       |         | 0.0000  |        |                                                |        |  |  |                                                    |  |  |  |                                                |  |  |  |
|               | C. placida     | Cp5              | 24.8874                                          |            | 6.8911   |          | 1.1414                                           |         | 5.4642  |         | 11.6813                                         |         | 0.3056  |        | 15.0355                                         |        | 0.0090  |         | 0.0000                                            |         | 1.0785 |         | 0.0000                                             |        | 0.0000 |        | 0.0000                                           |        | 0.0000 |        | 0.0000                                       |         | 0.0000  |        |                                                |        |  |  |                                                    |  |  |  |                                                |  |  |  |
|               |                | Cb. inv1         | 0.2098                                           |            | 0.1049   |          | 0.1049                                           |         | 0.0000  |         | 0.2997                                          |         | 4.0012  |        | 0.0150                                          |        | 0.0000  |         | 0.0000                                            |         | 0.0300 |         | 0.0000                                             |        | 0.0000 |        | 0.0000                                           |        | 0.0000 |        | 0.0000                                       |         | 0.0000  |        |                                                |        |  |  |                                                    |  |  |  |                                                |  |  |  |
| Invasive      | Generalist     | C. belti         | Cb. inv2                                         | 0.0785     |          | 0.0000   |                                                  | 0.0314  |         | 0.0000  |                                                 | 0.0785  |         | 0.0157 |                                                 | 0.0000 |         | 6.1244  |                                                   | 0.0000  |        | 0.0000  |                                                    | 0.0000 |        | 0.0000 |                                                  | 0.0000 |        | 0.0000 |                                              | 42.4152 |         | 0.0000 |                                                |        |  |  |                                                    |  |  |  |                                                |  |  |  |
|               |                |                  | Cb. inv3                                         | 0.3845     |          | 2.4665   |                                                  | 0.6752  |         | 0.0188  |                                                 | 1.9507  |         | 1.2754 |                                                 | 0.0000 |         | 0.0000  |                                                   | 15.4151 |        | 0.0000  |                                                    | 0.0000 |        | 0.0000 |                                                  | 0.0000 |        | 0.0000 |                                              | 0.0000  |         | 0.0000 |                                                |        |  |  |                                                    |  |  |  |                                                |  |  |  |
|               |                |                  | Cb. inv4                                         | 0.0497     |          | 0.0000   |                                                  | 0.3106  |         | 0.0124  |                                                 | 3.4911  |         | 4.8081 |                                                 | 0.0000 |         | 15.4096 |                                                   | 0.0000  |        | 46.1463 |                                                    | 0.0000 |        | 0.0000 |                                                  | 0.0000 |        | 0.0000 |                                              | 0.0000  |         | 0.0000 |                                                |        |  |  |                                                    |  |  |  |                                                |  |  |  |
|               |                |                  | Cd1. inv2                                        | 0.0000     |          | 1.7655   |                                                  | 4.6261  |         | 0.1322  |                                                 | 0.9630  |         | 0.3965 |                                                 | 0.0000 |         | 0.0000  |                                                   | 0.0094  |        | 0.0000  |                                                    | 0.0000 |        | 0.0000 |                                                  | 0.0000 |        | 0.0000 |                                              | 0.0000  |         | 0.0000 |                                                |        |  |  |                                                    |  |  |  |                                                |  |  |  |
|               | Specialist     | C. dilatocolis   | Cd1. inv3                                        | 0.0000     |          | 16.7882  |                                                  | 26.6857 |         | 0.9661  |                                                 | 1.6759  |         | 0.2957 |                                                 | 0.0000 |         | 0.0000  |                                                   | 0.0000  |        | 0.0000  |                                                    | 0.0000 |        | 0.0000 |                                                  | 0.0000 |        | 0.0000 |                                              | 0.0000  |         | 0.0000 |                                                |        |  |  |                                                    |  |  |  |                                                |  |  |  |
|               |                |                  | Cd1. inv1                                        | 0.0000     |          | 2.8591   |                                                  | 4.3780  |         | 0.0199  |                                                 | 1.5189  |         | 4.7255 |                                                 | 0.0000 |         | 0.0000  |                                                   | 0.0099  |        | 0.0000  |                                                    | 0.0000 |        | 0.0000 |                                                  | 0.0000 |        | 0.0000 |                                              | 0.0000  |         | 0.0000 |                                                |        |  |  |                                                    |  |  |  |                                                |  |  |  |
|               |                |                  | Cp. inv1                                         | 0.0262     |          | 16.4013  |                                                  | 1.0409  |         | 0.5073  |                                                 | 3.3852  |         | 0.0262 |                                                 | 0.0000 |         | 0.0000  |                                                   | 0.0000  |        | 0.0000  |                                                    | 0.0000 |        | 0.0000 |                                                  | 0.0000 |        | 0.0000 |                                              | 0.0000  |         | 0.0000 |                                                |        |  |  |                                                    |  |  |  |                                                |  |  |  |
|               |                |                  | Cp. inv2                                         | 0.0378     |          | 21.2856  |                                                  | 2.3976  |         | 0.6230  |                                                 | 12.7808 |         | 0.0755 |                                                 | 0.0094 |         | 0.0000  |                                                   | 0.0189  |        | 0.0000  |                                                    | 0.0000 |        | 0.0000 |                                                  | 0.0000 |        | 0.0000 |                                              | 0.0566  |         | 0.0000 |                                                |        |  |  |                                                    |  |  |  |                                                |  |  |  |
|               |                |                  | Lifestage                                        |            |          | Species  |                                                  |         |         |         |                                                 |         |         |        |                                                 |        |         |         |                                                   |         |        |         |                                                    |        |        |        |                                                  |        |        |        |                                              |         |         |        |                                                |        |  |  |                                                    |  |  |  |                                                |  |  |  |
|               |                |                  | Eggs                                             | Generalist | C. belti | Cb. egg1 | 0.0227                                           |         | 24.8073 |         | 0.7029                                          |         | 1.9955  |        | 2.6304                                          |        | 0.7256  |         | 11.3379                                           |         | 0.0227 |         | 0.0000                                             |        | 0.0000 |        | 0.0000                                           |        | 0.0000 |        | 0.0000                                       |         | 0.0000  |        | 0.0000                                         |        |  |  |                                                    |  |  |  |                                                |  |  |  |
| Cb. egg2      | 0.0000         |                  |                                                  |            |          | 9.1611   |                                                  | 1.3690  |         | 0.8132  |                                                 | 1.9763  |         | 0.2470 |                                                 | 0.3911 |         | 0.0000  |                                                   | 0.0000  |        | 0.0000  |                                                    | 0.0000 |        | 0.0000 |                                                  | 0.0000 |        | 0.0000 |                                              | 0.0000  |         |        |                                                |        |  |  |                                                    |  |  |  |                                                |  |  |  |
| Specialist    | C. dilatocolis | Cd1. egg1        |                                                  | 0.0000     |          | 12.0473  |                                                  | 11.8886 |         | 3.6647  |                                                 | 2.2940  |         | 0.3463 |                                                 | 8.9742 |         | 0.0000  |                                                   | 0.0000  |        | 0.0000  |                                                    | 0.0000 |        | 0.0000 |                                                  | 0.0000 |        | 0.0000 |                                              | 0.0000  |         |        |                                                |        |  |  |                                                    |  |  |  |                                                |  |  |  |
|               |                | Cd1. egg2        |                                                  | 4.4490     |          | 8.5421   |                                                  | 2.4641  |         | 0.8761  |                                                 | 7.0910  |         | 1.0130 |                                                 | 0.3285 |         | 0.0000  |                                                   | 0.0000  |        | 0.0000  |                                                    | 0.0000 |        | 0.0000 |                                                  | 0.0000 |        | 0.0000 |                                              | 0.0000  |         |        |                                                |        |  |  |                                                    |  |  |  |                                                |  |  |  |
| C. dorsalis   | Cd1. egg3      | 0.0894           |                                                  | 13.9013    |          | 3.6742   |                                                  | 9.8248  |         | 4.9884  |                                                 | 23.9764 |         | 1.7343 |                                                 | 0.0000 |         | 0.0000  |                                                   | 0.0179  |        | 0.0000  |                                                    | 0.0000 |        | 0.0000 |                                                  | 0.0000 |        | 0.0000 |                                              | 0.0000  |         |        |                                                |        |  |  |                                                    |  |  |  |                                                |  |  |  |
