# Supplementary material for: Diet breadth and exploitation of exotic plants shift the core microbiome of Cephaloleia, a group of tropical herbivorous beetles
Source: PeerJ. 2018 May 17;6:e4793. doi: 10.7717/peerj.4793 (PMC5960584; doi:10.7717/peerj.4793)
Supplement: Supplemental Information 2 — 16S rRNA barcode data for all samples in this study, at the family level, with and without Wolbachia included. [file peerj-06-4793-s002.xlsx]

## Sheet: no Wolbachia
Taxon	Cb_egg1	Cb_egg2	Cb_inv1	Cb_inv2	Cb_inv3	Cb_inv4	Cb1	Cb2	Cb3	Cb4	Cb5	Cb6	Cb7	Cb8	Cdil_egg1	Cdil_egg2	Cdil_inv1	Cdil_inv2	Cdil_inv4	Cdil1	Cdil2	Cdil3	Cdor_egg	Cdor1	Cdor2	Cdor3	Cf1	Cf2	Cf3	Cf4	Cf5	Cf6	Cf7	Cp_inv1	Cp_inv2	Cp1	Cp2	Cp3	Cp4	Cp5	Cr1	Cr2	Cr3
Bacteria;__Proteobacteria;__Gammaproteobacteria;__Pseudomonadales;__Moraxellaceae	1546	1473	1837	338	702	650	1350	70	151	13	420	67	1274	948	3491	2227	898	884	5916	4298	4907	7415	3483	5722	3102	650	4378	2871	1173	6727	5839	354	2383	2793	3428	8480	5764	4272	2979	4609	327	50	71
Bacteria;__Proteobacteria;__Gammaproteobacteria;__Enterobacteriales;__Enterobacteriaceae	344	364	532	2309	532	1209	280	29	1703	15	39	81	446	618	353	988	770	235	448	5318	4167	1043	3884	2074	609	3198	2425	1233	3308	1980	856	4684	211	608	1651	638	1223	1003	3449	1819	294	2	51
Bacteria;__Proteobacteria;__Alphaproteobacteria;__Rickettsiales;__Rickettsiaceae	1	2	3570	484	0	1402	3994	3490	4914	4113	0	386	5452	5	0	2	0	0	3	1	0	7	0	19	0	2	33	8	81	26	0	932	662	0	2	3	0	2	1	5	2101	3374	1889
Unassigned;Other;Other;Other;Other	319	1113	643	691	911	831	560	367	1334	205	442	531	180	585	545	168	923	1000	939	373	474	364	291	328	215	363	1067	2409	551	254	162	505	1506	458	583	282	349	293	424	700	1744	6048	96
Bacteria;__Tenericutes;__Mollicutes;__Entomoplasmatales;__Spiroplasmataceae	0	0	6	2914	6085	3522	1996	0	2476	2005	1	1099	1501	117	0	0	12	15	0	25	10	13	4	48	2290	5447	1	0	1	3	4	90	0	0	2	2	1	2	2	140	0	1	0
Bacteria;__Spirochaetae;__Spirochaetes;__Spirochaetales;__Brevinemataceae	63	0	162	73	543	13	0	0	1	0	3144	1	0	87	0	0	3762	4836	8	0	0	0	2	6	0	4	0	1	50	5	7	22	24	4266	742	5	0	17	2021	144	2109	619	1656
Bacteria;__Proteobacteria;__Gammaproteobacteria;__Pseudomonadales;__Pseudomonadaceae	726	173	8	3	13	5	12	6	98	0	12	5	8	214	804	1990	1464	465	225	1276	1837	420	1240	177	455	984	53	43	947	2429	443	30	617	342	549	477	617	277	495	890	0	2	2
Bacteria;__Proteobacteria;__Betaproteobacteria;__Burkholderiales;__Comamonadaceae	791	340	56	42	226	309	1012	706	90	224	42	10	81	487	823	346	94	137	269	352	333	952	436	689	554	372	720	722	121	608	380	190	281	77	153	155	1077	440	442	2179	20	25	5
Bacteria;__Firmicutes;__Bacilli;__Lactobacillales;__Streptococcaceae	135	3	74	4	46	393	72	6	117	3	18	33	29	5925	29	27	67	81	96	54	94	108	5	192	66	19	49	27	152	26	612	180	156	1875	24	138	30	3937	31	143	234	0	1
Bacteria;__Actinobacteria;__Actinobacteria;__Micrococcales;__Cellulomonadaceae	1	1	64	13	1904	117	2	1273	1495	159	672	9	24	19	0	0	0	1	14	1	2	4	0	25	6	1	4	5	2858	5	5	3436	679	4	13	471	1	66	3	0	0	2	1747
Bacteria;__Bacteroidetes;__Sphingobacteriia;__Sphingobacteriales;__Sphingobacteriaceae	574	1226	99	4	289	28	97	3	29	3	29	9	136	47	461	437	50	66	856	84	57	449	1454	753	243	612	270	127	25	9	182	91	350	730	1162	94	1468	40	287	293	3	0	12
Bacteria;__Proteobacteria;__Gammaproteobacteria;__Legionellales;__Coxiellaceae	0	0	0	0	1	2	0	0	0	0	0	9839	46	1716	0	0	0	0	0	0	0	0	0	2	0	0	0	0	0	0	0	4	2	0	7	0	0	0	0	4	0	1	0
Bacteria;__Bacteroidetes;__Flavobacteria;__Flavobacteriales;__Flavobacteriaceae	351	576	128	12	152	56	100	3	41	33	44	95	379	52	246	405	779	1492	392	8	33	121	62	750	72	50	311	553	74	10	133	403	110	386	558	73	492	17	28	127	216	2	0
Bacteria;__Proteobacteria;__Alphaproteobacteria;__Rhodospirillales;__Acetobacteraceae	2	3	6	9	19	18	33	175	2	6	2	2	267	17	0	126	49	54	65	398	188	53	7	12	7	4	14	32	5	6	8	25	10	120	872	318	472	1479	2225	435	24	0	1
Bacteria;__Proteobacteria;__Alphaproteobacteria;__Rhizobiales;__Rhizobiaceae	61	108	10	20	73	11	106	19	13	6	8	6	17	25	28	145	240	531	195	76	81	99	52	81	340	114	905	466	109	421	158	45	121	94	265	120	229	225	59	229	24	11	5
Bacteria;__Proteobacteria;__Gammaproteobacteria;Other;Other	3	5	0	4	46	15	111	91	74	6	9	6	8	629	11	9	80	18	19	57	59	26	11	15	31	20	241	1911	40	51	89	451	1534	13	37	19	30	12	11	36	1	14	5
Bacteria;__Proteobacteria;__Gammaproteobacteria;__Xanthomonadales;__Xanthomonadaceae	366	971	19	3	41	11	11	1	10	13	4	0	4	31	505	137	4	16	260	26	47	271	361	531	215	11	10	28	8	76	91	4	32	244	265	22	235	25	28	85	114	1	1
Bacteria;__Actinobacteria;__Actinobacteria;__Corynebacteriales;Other	0	1	124	88	339	8	114	17	135	130	1439	10	0	68	0	0	192	463	143	2	1	63	6	160	2	3	8	5	6	21	22	0	2	403	711	1	0	21	4	2	0	14	46
Bacteria;__Proteobacteria;__Alphaproteobacteria;__Sphingomonadales;__Sphingomonadaceae	30	198	2	5	62	6	32	40	9	2	4	1	12	26	10	117	194	343	221	37	22	53	59	110	139	44	777	368	11	19	31	34	90	203	364	72	239	257	75	160	9	6	3
Bacteria;__Proteobacteria;__Betaproteobacteria;__Burkholderiales;__Oxalobacteraceae	158	6	17	6	52	5	8	11	11	13	6	2	6	18	53	50	58	108	72	333	515	590	270	178	26	411	59	22	29	14	23	6	44	33	143	52	49	114	0	40	0	22	5
Bacteria;__Firmicutes;__Clostridia;__Clostridiales;__Family_XI_Incertae_Sedis	0	1	5	1	7	29	164	659	26	22	35	23	11	169	1	0	0	0	0	0	0	1	0	55	0	25	133	1001	1	6	0	399	766	0	0	0	1	0	1	0	0	8	1
Bacteria;__Actinobacteria;__Actinobacteria;__Micrococcales;__Sanguibacteraceae	0	0	0	0	0	0	1	0	0	0	0	0	2	0	0	0	1555	1010	589	0	0	0	0	0	0	0	0	0	0	0	0	0	1	1	9	0	0	0	0	0	0	0	0
Bacteria;__Bacteroidetes;__Sphingobacteriia;__Sphingobacteriales;__Chitinophagaceae	10	486	19	4	92	20	30	11	16	2	7	3	12	41	3	157	30	21	441	27	10	43	16	28	64	35	74	68	6	20	223	25	164	30	71	22	100	60	24	38	53	0	0
Bacteria;__Bacteroidetes;__Cytophagia;__Cytophagales;__Cytophagaceae	38	389	55	14	69	55	36	5	6	1	8	0	6	11	1	41	121	147	237	14	8	65	18	17	41	18	59	48	19	5	16	13	93	78	164	7	25	68	45	30	6	9	1
Bacteria;__Proteobacteria;__Gammaproteobacteria;__Vibrionales;__Vibrionaceae	1	0	132	190	22	45	2	0	9	0	0	40	446	440	24	0	41	397	16	1	0	1	0	1	4	3	1	1	19	0	0	4	4	72	60	1	1	0	2	2	86	0	0
Bacteria;__Proteobacteria;__Alphaproteobacteria;__Caulobacterales;__Caulobacteraceae	51	182	4	0	26	1	53	21	5	1	2	0	2	0	2	328	4	11	172	9	4	23	39	165	63	9	64	162	18	0	9	1	110	77	117	20	34	40	51	31	1	0	5
Bacteria;__Proteobacteria;__Betaproteobacteria;__Burkholderiales;__Burkholderiaceae	6	12	1	0	13	1	1	12	9	0	2	0	1	0	440	0	5	7	7	2	3	1	1045	47	10	125	0	3	14	4	9	10	2	2	2	2	1	2	1	5	0	9	0
Bacteria;__Proteobacteria;__Deltaproteobacteria;__Myxococcales;__Myxococcaceae	0	1735	0	0	0	0	0	0	0	0	0	0	0	0	0	0	0	0	0	0	0	0	0	0	8	0	0	0	0	0	0	0	0	0	0	0	0	0	0	2	0	0	0
Bacteria;__Proteobacteria;__Betaproteobacteria;__Neisseriales;__Neisseriaceae	0	0	4	1	10	176	6	912	77	7	7	15	24	32	5	3	58	24	12	1	8	4	0	14	5	19	7	5	6	2	62	64	64	0	5	1	0	15	1	4	5	0	0
Bacteria;__Proteobacteria;__Alphaproteobacteria;__Rhodobacterales;__Rhodobacteraceae	14	146	6	5	80	2	4	4	3	0	0	18	2	13	2	207	1	15	7	53	58	19	28	33	116	30	40	19	35	10	210	9	43	0	13	19	188	75	6	87	0	6	10
Bacteria;__Proteobacteria;__Gammaproteobacteria;__Orbales;__Orbaceae	0	0	1	1	9	12	1	1095	0	30	12	2	130	36	0	6	36	36	25	0	0	1	0	0	0	0	0	0	124	3	0	26	12	1	11	0	0	0	0	0	0	0	0
Bacteria;__Firmicutes;__Bacilli;__Lactobacillales;__Lactobacillaceae	1	4	0	1	3	901	3	29	50	5	75	19	87	22	0	6	5	9	7	0	5	6	1	20	10	1	37	10	4	3	7	26	9	0	0	2	2	0	11	1	2	0	2
Bacteria;__Proteobacteria;__Alphaproteobacteria;__Rhizobiales;Other	0	18	2	5	49	4	8	0	2	1	0	2	2	10	0	29	31	61	157	36	27	27	3	9	152	40	82	13	10	11	33	44	43	82	48	18	94	23	8	163	0	5	4
Bacteria;__Proteobacteria;__Deltaproteobacteria;__Bdellovibrionales;__Bdellovibrionaceae	0	44	10	0	23	13	8	2	4	0	2	0	4	0	0	16	15	13	15	12	33	151	11	29	4	7	51	14	11	0	0	3	530	0	18	12	53	10	101	86	1	7	0
Bacteria;__Bacteroidetes;__Flavobacteria;__Flavobacteriales;__Cryomorphaceae	0	141	38	0	38	40	70	30	3	20	1	8	1	25	0	46	11	8	10	16	13	284	7	9	5	12	104	152	0	0	0	0	0	1	9	12	9	0	121	50	2	0	1
Bacteria;__Proteobacteria;__Alphaproteobacteria;__Rhizobiales;__Brucellaceae	38	797	0	0	4	7	1	0	2	0	0	0	0	1	45	45	0	0	0	1	0	5	33	127	76	3	0	1	0	9	8	0	3	0	0	0	3	1	0	4	0	4	0
Bacteria;__Fusobacteria;__Fusobacteriia;__Fusobacteriales;__Leptotrichiaceae	0	0	0	0	0	0	10	940	4	1	0	1	0	0	0	0	0	2	0	0	0	12	0	7	0	2	0	6	0	6	17	0	0	0	0	1	0	0	6	2	0	11	149
Bacteria;__Proteobacteria;__Alphaproteobacteria;__Rhizobiales;__Hyphomicrobiaceae	1	111	2	0	16	3	134	66	0	1	0	0	3	2	0	20	1	2	28	6	3	30	9	20	21	60	112	178	1	2	3	2	22	6	10	10	6	25	89	33	1	0	0
Bacteria;Other;Other;Other;Other	15	23	1	0	9	8	4	0	5	0	0	0	2	1	11	5	8	6	15	158	81	52	37	24	7	10	46	23	12	6	8	43	5	23	104	44	91	14	7	60	1	0	0
Bacteria;__Actinobacteria;__Actinobacteria;__Micrococcales;__Micrococcaceae	3	50	52	0	1	7	29	0	4	2	2	26	22	16	2	57	20	7	39	20	8	119	18	140	52	3	3	6	2	12	37	3	17	12	14	5	7	3	73	12	1	0	0
Bacteria;__Actinobacteria;__Actinobacteria;__Micrococcales;__Microbacteriaceae	0	297	124	3	20	42	5	0	2	2	0	0	5	6	0	14	22	30	54	7	7	16	3	20	8	12	7	12	0	5	48	0	16	7	20	3	2	9	5	1	1	4	2
Bacteria;__Proteobacteria;__Alphaproteobacteria;__Rhizobiales;__Methylobacteriaceae	0	12	0	1	26	9	1	8	5	0	2	2	0	13	1	97	17	15	112	17	11	6	40	11	19	60	2	3	2	16	10	13	3	62	125	6	60	21	10	16	0	2	0
Bacteria;__Proteobacteria;__Alphaproteobacteria;__Rhodospirillales;__Rhodospirillaceae	1	10	0	0	8	4	14	2	3	0	0	6	4	330	0	6	1	2	6	15	16	12	38	18	42	29	115	6	1	0	0	1	4	0	23	25	17	1	6	35	27	0	0
Bacteria;__Proteobacteria;__Betaproteobacteria;__Methylophilales;__Methylophilaceae	85	22	5	2	8	4	0	0	0	1	0	0	0	1	48	19	3	4	25	14	2	4	69	83	19	1	7	4	0	0	7	0	74	0	1	5	124	102	1	28	0	0	7
Bacteria;__Proteobacteria;__Betaproteobacteria;__Burkholderiales;__Alcaligenaceae	1	582	0	0	0	0	0	0	0	0	0	0	0	1	17	7	0	4	0	0	3	6	41	34	22	20	0	1	2	0	0	0	3	0	0	0	0	0	1	3	0	0	0
Bacteria;__Proteobacteria;__Betaproteobacteria;__Rhodocyclales;__Rhodocyclaceae	0	1	0	1	6	2	2	0	6	0	0	3	2	12	0	10	5	4	14	3	0	1	2	19	400	11	33	5	7	5	7	1	2	2	5	6	1	35	0	18	1	0	0
Bacteria;__Actinobacteria;__Actinobacteria;__Corynebacteriales;__Nocardiaceae	0	40	17	34	63	52	21	2	6	2	4	1	0	53	0	31	5	5	23	2	1	8	11	21	20	13	8	3	52	8	4	2	17	10	25	6	0	0	5	4	25	5	0
Bacteria;__Firmicutes;__Bacilli;__Bacillales;__Staphylococcaceae	1	2	0	1	5	3	3	0	2	0	0	2	94	11	3	27	8	48	18	0	6	6	8	30	26	5	4	23	1	35	107	32	7	2	11	9	1	0	4	22	1	34	3
Bacteria;__Bacteroidetes;__Flavobacteria;__Flavobacteriales;__Blattabacteriaceae	0	0	0	0	0	0	0	0	0	0	0	0	0	0	0	0	0	0	260	0	0	0	0	0	0	0	0	0	0	0	0	0	0	0	337	0	0	0	0	0	0	0	0
Bacteria;__Proteobacteria;__Gammaproteobacteria;__Pasteurellales;__Pasteurellaceae	0	0	4	1	9	0	2	0	18	2	3	2	18	1	2	4	355	36	0	0	31	1	0	10	5	1	1	2	4	0	0	36	20	0	2	6	0	0	1	2	3	0	0
Bacteria;__Candidate_division_OD1;__c;__o;__f	0	0	10	1	23	35	0	0	0	0	0	0	0	0	0	0	154	96	133	1	1	0	0	0	5	0	2	0	2	0	9	4	5	21	53	3	1	0	0	1	0	6	0
Bacteria;__Bacteroidetes;__Bacteroidia;__Bacteroidales;__Porphyromonadaceae	0	7	0	2	18	13	7	3	12	1	4	24	0	10	3	10	19	17	21	0	12	5	0	35	90	1	58	13	1	36	20	9	10	5	13	2	2	3	20	12	1	8	0
Bacteria;__Proteobacteria;__Alphaproteobacteria;__Rhizobiales;__Bradyrhizobiaceae	1	97	0	0	45	9	12	4	0	0	1	2	4	15	0	6	1	0	26	12	3	7	9	5	9	22	33	41	4	3	1	8	35	14	13	3	20	11	13	12	21	0	1
Bacteria;__Firmicutes;__Clostridia;__Clostridiales;__Ruminococcaceae	0	2	1	3	1	3	5	7	5	6	15	1	1	28	0	0	0	2	5	0	1	1	0	3	4	0	129	2	0	6	7	251	17	0	0	0	0	0	0	0	0	0	0
Bacteria;__Tenericutes;__Mollicutes;__Entomoplasmatales;__Entomoplasmataceae	0	0	5	0	0	0	5	0	4	0	0	0	0	0	0	0	0	0	0	0	0	4	1	1	386	24	2	7	0	0	13	0	0	0	0	1	0	0	0	17	0	0	0
Bacteria;__Proteobacteria;__Alphaproteobacteria;__Rhizobiales;__Xanthobacteraceae	0	0	0	0	4	0	106	19	3	4	1	3	2	8	0	1	0	1	0	16	5	82	5	3	1	10	10	35	1	0	2	3	5	0	14	11	14	5	47	37	10	0	1
Bacteria;__Actinobacteria;__Actinobacteria;__Propionibacteriales;__Nocardioidaceae	0	20	2	0	10	2	3	0	2	1	0	0	0	23	0	1	1	9	187	0	0	2	4	3	30	6	11	7	0	0	0	2	1	51	47	8	0	0	3	3	0	1	0
Bacteria;__Verrucomicrobia;__Verrucomicrobiae;__Verrucomicrobiales;__Verrucomicrobiaceae	0	274	1	0	6	0	3	0	0	0	2	2	0	11	0	18	49	1	4	1	0	3	6	4	4	2	3	2	0	0	2	9	4	0	3	1	15	7	0	3	0	0	0
Bacteria;__Firmicutes;__Bacilli;__Lactobacillales;__Enterococcaceae	2	1	4	0	4	21	3	19	2	0	0	0	2	2	0	19	155	17	3	0	0	2	0	1	14	5	4	4	1	11	12	1	0	0	13	45	0	8	0	0	0	6	0
Bacteria;__Proteobacteria;__Alphaproteobacteria;__Sphingomonadales;Other	0	23	0	2	34	2	1	0	0	0	0	0	0	2	0	124	2	0	7	11	4	2	53	20	11	6	0	1	0	6	6	0	0	0	0	0	30	5	1	25	0	2	0
Bacteria;__Firmicutes;__Bacilli;__Lactobacillales;__Leuconostocaceae	3	0	19	8	19	0	4	111	1	1	3	6	97	2	0	1	17	13	9	2	1	0	3	15	11	1	0	0	0	7	3	6	2	0	6	0	2	0	1	2	1	0	0
Bacteria;__Proteobacteria;__Gammaproteobacteria;__Oceanospirillales;__Oceanospirillaceae	0	0	0	0	1	2	0	1	1	0	0	0	2	0	11	269	4	5	0	8	6	11	1	18	3	1	0	1	0	2	0	0	0	0	0	3	6	1	4	3	0	0	0
Bacteria;__Actinobacteria;__Actinobacteria;__Corynebacteriales;__Tsukamurellaceae	0	24	4	2	59	6	9	0	0	0	2	0	2	10	0	4	0	6	45	1	1	9	7	6	12	0	2	7	1	0	55	1	4	25	43	1	0	0	4	0	0	1	0
Bacteria;__Bacteroidetes;__Sphingobacteriia;__Sphingobacteriales;__env.OPS_17	0	0	3	2	11	7	0	0	5	0	1	0	5	8	0	2	8	2	12	0	0	0	0	2	0	2	0	1	1	0	0	0	255	0	0	0	0	3	0	0	0	0	0
Bacteria;__Actinobacteria;__Actinobacteria;__Corynebacteriales;__Corynebacteriaceae	0	0	0	0	54	14	0	11	14	1	2	4	4	2	1	10	15	1	24	1	3	9	2	7	9	2	0	3	2	39	27	10	4	0	7	1	1	1	3	17	1	22	0
Bacteria;__Proteobacteria;__Alphaproteobacteria;Other;Other	0	0	1	0	5	1	69	1	0	0	0	0	0	1	0	2	10	2	1	3	1	1	3	1	43	0	9	2	0	0	66	0	0	0	2	2	0	0	0	9	79	0	1
Bacteria;__Proteobacteria;__Epsilonproteobacteria;__Campylobacterales;__Campylobacteraceae	0	1	3	0	0	0	3	1	26	0	1	0	3	1	6	6	55	1	11	0	16	16	0	28	62	4	25	8	0	11	0	0	2	0	1	6	0	7	0	6	0	0	0
Bacteria;__Proteobacteria;__Alphaproteobacteria;__Rickettsiales;__Family_Incertae_Sedis	0	277	0	0	0	0	0	0	0	0	0	0	0	0	0	0	0	9	1	0	0	0	0	1	0	0	0	0	0	0	16	0	0	0	0	1	0	0	0	4	1	0	0
Bacteria;__Spirochaetae;__Spirochaetes;__Spirochaetales;__Spirochaetaceae	0	0	0	0	3	1	44	1	18	0	2	0	0	1	0	0	4	5	16	1	0	5	0	0	82	25	1	6	0	3	37	0	0	5	2	7	9	0	1	3	0	0	0
Bacteria;__Proteobacteria;__Deltaproteobacteria;__Bdellovibrionales;__Bacteriovoracaceae	1	5	0	1	0	0	5	0	2	0	0	0	2	13	0	41	2	1	26	1	1	4	3	22	5	1	10	2	0	0	23	5	48	2	10	0	30	0	0	7	0	0	0
Bacteria;__Firmicutes;__Bacilli;__Bacillales;__Paenibacillaceae	3	4	0	0	0	0	0	1	1	0	0	1	0	0	0	0	0	0	0	0	0	0	1	114	4	116	2	0	0	0	0	2	0	0	1	1	4	0	1	5	0	2	0
Bacteria;__Proteobacteria;__Gammaproteobacteria;__Xanthomonadales;__Solimonadaceae	0	258	0	0	1	0	0	0	0	0	0	0	0	0	0	0	0	2	0	0	0	0	1	0	0	0	0	0	0	0	0	0	0	0	0	0	0	0	0	0	0	0	0
Bacteria;__Proteobacteria;__Deltaproteobacteria;__Myxococcales;Other	0	1	0	0	13	7	70	34	0	0	3	0	1	11	0	0	0	0	0	0	0	3	1	2	1	3	9	70	0	0	0	2	0	2	2	0	0	4	3	3	0	0	0
Bacteria;__Firmicutes;__Bacilli;__Bacillales;__Bacillaceae	9	39	0	0	2	5	0	0	1	0	0	1	7	8	69	1	1	0	6	1	0	7	1	1	0	0	0	1	3	18	2	7	8	0	10	2	4	0	2	3	0	18	0
Bacteria;__Fusobacteria;__Fusobacteriia;__Fusobacteriales;__Fusobacteriaceae	0	1	0	0	0	4	0	0	6	0	0	0	1	3	1	1	122	7	0	1	12	1	0	0	0	1	0	0	9	59	0	0	0	0	0	0	1	0	0	1	3	0	1
Bacteria;__BD1-5;__c;__o;__f	0	1	2	0	4	3	3	0	3	0	0	0	0	53	0	1	8	6	14	3	0	1	0	0	0	0	51	0	0	2	0	46	9	0	7	4	0	0	0	11	0	0	0
Bacteria;__Cyanobacteria;__ML635J-21;__o;__f	0	1	1	0	1	0	24	4	0	0	0	0	0	2	0	1	0	0	0	6	1	18	0	1	0	0	85	29	0	0	5	0	2	0	0	2	1	8	30	6	0	0	0
Bacteria;__Proteobacteria;__Alphaproteobacteria;__Rhizobiales;__Methylocystaceae	0	19	0	1	13	0	9	0	3	0	1	1	0	8	0	2	0	0	1	1	1	8	1	2	24	2	51	6	0	0	20	7	2	0	2	18	2	3	2	7	0	0	0
Bacteria;__Proteobacteria;__Betaproteobacteria;Other;Other	0	2	2	0	6	6	0	17	0	0	0	0	0	0	4	0	67	22	0	0	17	1	0	2	7	0	0	0	1	4	35	0	1	0	0	0	0	3	0	0	0	0	0
Bacteria;__Actinobacteria;__Actinobacteria;__Actinomycetales;__Actinomycetaceae	0	0	1	1	0	1	0	0	1	0	0	7	7	0	2	1	3	8	3	1	9	2	2	7	7	2	11	11	0	55	0	15	8	0	0	4	0	0	0	5	2	0	0
Bacteria;__Tenericutes;__Mollicutes;__Mycoplasmatales;__Mycoplasmataceae	0	0	9	0	1	0	0	1	22	0	1	1	3	22	0	1	0	0	1	4	9	18	3	0	8	5	12	4	2	1	0	4	0	0	2	9	1	1	1	24	1	0	0
Bacteria;__Planctomycetes;__Planctomycetacia;__Planctomycetales;__Planctomycetaceae	0	35	14	0	1	0	0	0	0	2	0	0	0	0	0	6	34	5	3	0	0	0	3	9	1	3	1	1	6	3	0	12	1	3	16	1	0	0	1	0	0	0	0
Bacteria;__Proteobacteria;__Gammaproteobacteria;__Chromatiales;__Chromatiaceae	0	0	0	0	0	1	5	12	3	1	0	0	0	26	0	0	0	0	0	0	0	0	0	0	6	0	7	34	0	0	0	6	51	0	0	0	0	0	0	0	0	1	0
Bacteria;__Proteobacteria;__Epsilonproteobacteria;__Campylobacterales;__Helicobacteraceae	0	0	5	1	7	1	1	1	1	0	2	3	0	0	1	0	62	13	10	1	3	5	3	0	0	2	5	6	0	1	0	0	1	0	5	2	2	0	3	1	1	0	0
Bacteria;__Candidate_division_SR1;__c;__o;__f	0	0	3	0	3	3	0	0	0	0	0	0	0	0	0	0	14	1	7	0	0	2	0	3	5	1	70	2	1	0	0	0	10	1	1	10	0	0	0	1	0	0	0
Bacteria;__Actinobacteria;__Actinobacteria;__Corynebacteriales;__Segniliparaceae	0	0	10	12	7	1	5	1	2	7	45	0	0	1	0	0	6	5	0	0	0	0	0	1	0	0	0	0	0	0	0	0	0	15	15	0	0	0	0	0	0	0	0

## Sheet: with Wolbachia
Taxon	Cb_egg1	Cb_egg2	Cb_inv1	Cb_inv2	Cb_inv3	Cb_inv4	Cb1	Cb2	Cb3	Cb4	Cb5	Cb6	Cb7	Cb8	Cdil_egg1	Cdil_egg2	Cdil_inv1	Cdil_inv2	Cdil_inv4	Cdil1	Cdil2	Cdil3	Cdor_egg	Cdor1	Cdor2	Cdor3	Cf1	Cf2	Cf3	Cf4	Cf5	Cf6	Cf7	Cp_inv1	Cp_inv2	Cp1	Cp2	Cp3	Cp4	Cp5	Cr1	Cr2	Cr3
Bacteria;__Proteobacteria;__Alphaproteobacteria;__Rickettsiales;__Anaplasmataceae	4580	0	4994	2815	0	2942	2213	2908	20	6253	6652	872	2388	101	0	0	0	0	0	0	0	0	0	0	0	0	16	193	3364	61	3010	531	1704	0	0	0	0	0	0	0	5719	2945	7553
Bacteria;__Proteobacteria;__Gammaproteobacteria;__Pseudomonadales;__Moraxellaceae	1546	1473	1837	338	702	650	1350	70	151	13	420	67	1274	948	3491	2227	898	884	5916	4298	4907	7415	3483	5722	3102	650	4378	2871	1173	6727	5839	354	2383	2793	3428	8480	5764	4272	2979	4609	327	50	71
Bacteria;__Proteobacteria;__Gammaproteobacteria;__Enterobacteriales;__Enterobacteriaceae	344	364	532	2309	532	1209	280	29	1703	15	39	81	446	618	353	988	770	235	448	5318	4167	1043	3884	2074	609	3198	2425	1233	3308	1980	856	4684	211	608	1651	638	1223	1003	3449	1819	294	2	51
Bacteria;__Proteobacteria;__Alphaproteobacteria;__Rickettsiales;__Rickettsiaceae	1	2	3570	484	0	1402	3994	3490	4914	4113	0	386	5452	5	0	2	0	0	3	1	0	7	0	19	0	2	33	8	81	26	0	932	662	0	2	3	0	2	1	5	2101	3374	1889
Unassigned;Other;Other;Other;Other	319	1113	643	691	911	831	560	367	1334	205	442	531	180	585	545	168	923	1000	939	373	474	364	291	328	215	363	1067	2409	551	254	162	505	1506	458	583	282	349	293	424	700	1744	6048	96
Bacteria;__Tenericutes;__Mollicutes;__Entomoplasmatales;__Spiroplasmataceae	0	0	6	2914	6085	3522	1996	0	2476	2005	1	1099	1501	117	0	0	12	15	0	25	10	13	4	48	2290	5447	1	0	1	3	4	90	0	0	2	2	1	2	2	140	0	1	0
Bacteria;__Spirochaetae;__Spirochaetes;__Spirochaetales;__Brevinemataceae	63	0	162	73	543	13	0	0	1	0	3144	1	0	87	0	0	3762	4836	8	0	0	0	2	6	0	4	0	1	50	5	7	22	24	4266	742	5	0	17	2021	144	2109	619	1656
Bacteria;__Proteobacteria;__Gammaproteobacteria;__Pseudomonadales;__Pseudomonadaceae	726	173	8	3	13	5	12	6	98	0	12	5	8	214	804	1990	1464	465	225	1276	1837	420	1240	177	455	984	53	43	947	2429	443	30	617	342	549	477	617	277	495	890	0	2	2
Bacteria;__Proteobacteria;__Betaproteobacteria;__Burkholderiales;__Comamonadaceae	791	340	56	42	226	309	1012	706	90	224	42	10	81	487	823	346	94	137	269	352	333	952	436	689	554	372	720	722	121	608	380	190	281	77	153	155	1077	440	442	2179	20	25	5
Bacteria;__Firmicutes;__Bacilli;__Lactobacillales;__Streptococcaceae	135	3	74	4	46	393	72	6	117	3	18	33	29	5925	29	27	67	81	96	54	94	108	5	192	66	19	49	27	152	26	612	180	156	1875	24	138	30	3937	31	143	234	0	1
Bacteria;__Actinobacteria;__Actinobacteria;__Micrococcales;__Cellulomonadaceae	1	1	64	13	1904	117	2	1273	1495	159	672	9	24	19	0	0	0	1	14	1	2	4	0	25	6	1	4	5	2858	5	5	3436	679	4	13	471	1	66	3	0	0	2	1747
Bacteria;__Bacteroidetes;__Sphingobacteriia;__Sphingobacteriales;__Sphingobacteriaceae	574	1226	99	4	289	28	97	3	29	3	29	9	136	47	461	437	50	66	856	84	57	449	1454	753	243	612	270	127	25	9	182	91	350	730	1162	94	1468	40	287	293	3	0	12
Bacteria;__Proteobacteria;__Gammaproteobacteria;__Legionellales;__Coxiellaceae	0	0	0	0	1	2	0	0	0	0	0	9839	46	1716	0	0	0	0	0	0	0	0	0	2	0	0	0	0	0	0	0	4	2	0	7	0	0	0	0	4	0	1	0
Bacteria;__Bacteroidetes;__Flavobacteria;__Flavobacteriales;__Flavobacteriaceae	351	576	128	12	152	56	100	3	41	33	44	95	379	52	246	405	779	1492	392	8	33	121	62	750	72	50	311	553	74	10	133	403	110	386	558	73	492	17	28	127	216	2	0
Bacteria;__Proteobacteria;__Alphaproteobacteria;__Rhodospirillales;__Acetobacteraceae	2	3	6	9	19	18	33	175	2	6	2	2	267	17	0	126	49	54	65	398	188	53	7	12	7	4	14	32	5	6	8	25	10	120	872	318	472	1479	2225	435	24	0	1
Bacteria;__Proteobacteria;__Alphaproteobacteria;__Rhizobiales;__Rhizobiaceae	61	108	10	20	73	11	106	19	13	6	8	6	17	25	28	145	240	531	195	76	81	99	52	81	340	114	905	466	109	421	158	45	121	94	265	120	229	225	59	229	24	11	5
Bacteria;__Proteobacteria;__Gammaproteobacteria;Other;Other	3	5	0	4	46	15	111	91	74	6	9	6	8	629	11	9	80	18	19	57	59	26	11	15	31	20	241	1911	40	51	89	451	1534	13	37	19	30	12	11	36	1	14	5
Bacteria;__Proteobacteria;__Gammaproteobacteria;__Xanthomonadales;__Xanthomonadaceae	366	971	19	3	41	11	11	1	10	13	4	0	4	31	505	137	4	16	260	26	47	271	361	531	215	11	10	28	8	76	91	4	32	244	265	22	235	25	28	85	114	1	1
Bacteria;__Actinobacteria;__Actinobacteria;__Corynebacteriales;Other	0	1	124	88	339	8	114	17	135	130	1439	10	0	68	0	0	192	463	143	2	1	63	6	160	2	3	8	5	6	21	22	0	2	403	711	1	0	21	4	2	0	14	46
Bacteria;__Proteobacteria;__Alphaproteobacteria;__Sphingomonadales;__Sphingomonadaceae	30	198	2	5	62	6	32	40	9	2	4	1	12	26	10	117	194	343	221	37	22	53	59	110	139	44	777	368	11	19	31	34	90	203	364	72	239	257	75	160	9	6	3
Bacteria;__Proteobacteria;__Betaproteobacteria;__Burkholderiales;__Oxalobacteraceae	158	6	17	6	52	5	8	11	11	13	6	2	6	18	53	50	58	108	72	333	515	590	270	178	26	411	59	22	29	14	23	6	44	33	143	52	49	114	0	40	0	22	5
Bacteria;__Firmicutes;__Clostridia;__Clostridiales;__Family_XI_Incertae_Sedis	0	1	5	1	7	29	164	659	26	22	35	23	11	169	1	0	0	0	0	0	0	1	0	55	0	25	133	1001	1	6	0	399	766	0	0	0	1	0	1	0	0	8	1
Bacteria;__Actinobacteria;__Actinobacteria;__Micrococcales;__Sanguibacteraceae	0	0	0	0	0	0	1	0	0	0	0	0	2	0	0	0	1555	1010	589	0	0	0	0	0	0	0	0	0	0	0	0	0	1	1	9	0	0	0	0	0	0	0	0
Bacteria;__Bacteroidetes;__Sphingobacteriia;__Sphingobacteriales;__Chitinophagaceae	10	486	19	4	92	20	30	11	16	2	7	3	12	41	3	157	30	21	441	27	10	43	16	28	64	35	74	68	6	20	223	25	164	30	71	22	100	60	24	38	53	0	0
Bacteria;__Bacteroidetes;__Cytophagia;__Cytophagales;__Cytophagaceae	38	389	55	14	69	55	36	5	6	1	8	0	6	11	1	41	121	147	237	14	8	65	18	17	41	18	59	48	19	5	16	13	93	78	164	7	25	68	45	30	6	9	1
Bacteria;__Proteobacteria;__Gammaproteobacteria;__Vibrionales;__Vibrionaceae	1	0	132	190	22	45	2	0	9	0	0	40	446	440	24	0	41	397	16	1	0	1	0	1	4	3	1	1	19	0	0	4	4	72	60	1	1	0	2	2	86	0	0
Bacteria;__Proteobacteria;__Alphaproteobacteria;__Caulobacterales;__Caulobacteraceae	51	182	4	0	26	1	53	21	5	1	2	0	2	0	2	328	4	11	172	9	4	23	39	165	63	9	64	162	18	0	9	1	110	77	117	20	34	40	51	31	1	0	5
Bacteria;__Proteobacteria;__Betaproteobacteria;__Burkholderiales;__Burkholderiaceae	6	12	1	0	13	1	1	12	9	0	2	0	1	0	440	0	5	7	7	2	3	1	1045	47	10	125	0	3	14	4	9	10	2	2	2	2	1	2	1	5	0	9	0
Bacteria;__Proteobacteria;__Deltaproteobacteria;__Myxococcales;__Myxococcaceae	0	1735	0	0	0	0	0	0	0	0	0	0	0	0	0	0	0	0	0	0	0	0	0	0	8	0	0	0	0	0	0	0	0	0	0	0	0	0	0	2	0	0	0
Bacteria;__Proteobacteria;__Betaproteobacteria;__Neisseriales;__Neisseriaceae	0	0	4	1	10	176	6	912	77	7	7	15	24	32	5	3	58	24	12	1	8	4	0	14	5	19	7	5	6	2	62	64	64	0	5	1	0	15	1	4	5	0	0
Bacteria;__Proteobacteria;__Alphaproteobacteria;__Rhodobacterales;__Rhodobacteraceae	14	146	6	5	80	2	4	4	3	0	0	18	2	13	2	207	1	15	7	53	58	19	28	33	116	30	40	19	35	10	210	9	43	0	13	19	188	75	6	87	0	6	10
Bacteria;__Proteobacteria;__Gammaproteobacteria;__Orbales;__Orbaceae	0	0	1	1	9	12	1	1095	0	30	12	2	130	36	0	6	36	36	25	0	0	1	0	0	0	0	0	0	124	3	0	26	12	1	11	0	0	0	0	0	0	0	0
Bacteria;__Firmicutes;__Bacilli;__Lactobacillales;__Lactobacillaceae	1	4	0	1	3	901	3	29	50	5	75	19	87	22	0	6	5	9	7	0	5	6	1	20	10	1	37	10	4	3	7	26	9	0	0	2	2	0	11	1	2	0	2
Bacteria;__Proteobacteria;__Alphaproteobacteria;__Rhizobiales;Other	0	18	2	5	49	4	8	0	2	1	0	2	2	10	0	29	31	61	157	36	27	27	3	9	152	40	82	13	10	11	33	44	43	82	48	18	94	23	8	163	0	5	4
Bacteria;__Proteobacteria;__Deltaproteobacteria;__Bdellovibrionales;__Bdellovibrionaceae	0	44	10	0	23	13	8	2	4	0	2	0	4	0	0	16	15	13	15	12	33	151	11	29	4	7	51	14	11	0	0	3	530	0	18	12	53	10	101	86	1	7	0
Bacteria;__Bacteroidetes;__Flavobacteria;__Flavobacteriales;__Cryomorphaceae	0	141	38	0	38	40	70	30	3	20	1	8	1	25	0	46	11	8	10	16	13	284	7	9	5	12	104	152	0	0	0	0	0	1	9	12	9	0	121	50	2	0	1
Bacteria;__Proteobacteria;__Alphaproteobacteria;__Rhizobiales;__Brucellaceae	38	797	0	0	4	7	1	0	2	0	0	0	0	1	45	45	0	0	0	1	0	5	33	127	76	3	0	1	0	9	8	0	3	0	0	0	3	1	0	4	0	4	0
Bacteria;__Fusobacteria;__Fusobacteriia;__Fusobacteriales;__Leptotrichiaceae	0	0	0	0	0	0	10	940	4	1	0	1	0	0	0	0	0	2	0	0	0	12	0	7	0	2	0	6	0	6	17	0	0	0	0	1	0	0	6	2	0	11	149
Bacteria;__Proteobacteria;__Alphaproteobacteria;__Rhizobiales;__Hyphomicrobiaceae	1	111	2	0	16	3	134	66	0	1	0	0	3	2	0	20	1	2	28	6	3	30	9	20	21	60	112	178	1	2	3	2	22	6	10	10	6	25	89	33	1	0	0
Bacteria;Other;Other;Other;Other	15	23	1	0	9	8	4	0	5	0	0	0	2	1	11	5	8	6	15	158	81	52	37	24	7	10	46	23	12	6	8	43	5	23	104	44	91	14	7	60	1	0	0
Bacteria;__Actinobacteria;__Actinobacteria;__Micrococcales;__Micrococcaceae	3	50	52	0	1	7	29	0	4	2	2	26	22	16	2	57	20	7	39	20	8	119	18	140	52	3	3	6	2	12	37	3	17	12	14	5	7	3	73	12	1	0	0
Bacteria;__Actinobacteria;__Actinobacteria;__Micrococcales;__Microbacteriaceae	0	297	124	3	20	42	5	0	2	2	0	0	5	6	0	14	22	30	54	7	7	16	3	20	8	12	7	12	0	5	48	0	16	7	20	3	2	9	5	1	1	4	2
Bacteria;__Proteobacteria;__Alphaproteobacteria;__Rhizobiales;__Methylobacteriaceae	0	12	0	1	26	9	1	8	5	0	2	2	0	13	1	97	17	15	112	17	11	6	40	11	19	60	2	3	2	16	10	13	3	62	125	6	60	21	10	16	0	2	0
Bacteria;__Proteobacteria;__Alphaproteobacteria;__Rhodospirillales;__Rhodospirillaceae	1	10	0	0	8	4	14	2	3	0	0	6	4	330	0	6	1	2	6	15	16	12	38	18	42	29	115	6	1	0	0	1	4	0	23	25	17	1	6	35	27	0	0
Bacteria;__Proteobacteria;__Betaproteobacteria;__Methylophilales;__Methylophilaceae	85	22	5	2	8	4	0	0	0	1	0	0	0	1	48	19	3	4	25	14	2	4	69	83	19	1	7	4	0	0	7	0	74	0	1	5	124	102	1	28	0	0	7
Bacteria;__Proteobacteria;__Betaproteobacteria;__Burkholderiales;__Alcaligenaceae	1	582	0	0	0	0	0	0	0	0	0	0	0	1	17	7	0	4	0	0	3	6	41	34	22	20	0	1	2	0	0	0	3	0	0	0	0	0	1	3	0	0	0
Bacteria;__Proteobacteria;__Betaproteobacteria;__Rhodocyclales;__Rhodocyclaceae	0	1	0	1	6	2	2	0	6	0	0	3	2	12	0	10	5	4	14	3	0	1	2	19	400	11	33	5	7	5	7	1	2	2	5	6	1	35	0	18	1	0	0
Bacteria;__Actinobacteria;__Actinobacteria;__Corynebacteriales;__Nocardiaceae	0	40	17	34	63	52	21	2	6	2	4	1	0	53	0	31	5	5	23	2	1	8	11	21	20	13	8	3	52	8	4	2	17	10	25	6	0	0	5	4	25	5	0
Bacteria;__Firmicutes;__Bacilli;__Bacillales;__Staphylococcaceae	1	2	0	1	5	3	3	0	2	0	0	2	94	11	3	27	8	48	18	0	6	6	8	30	26	5	4	23	1	35	107	32	7	2	11	9	1	0	4	22	1	34	3
Bacteria;__Bacteroidetes;__Flavobacteria;__Flavobacteriales;__Blattabacteriaceae	0	0	0	0	0	0	0	0	0	0	0	0	0	0	0	0	0	0	260	0	0	0	0	0	0	0	0	0	0	0	0	0	0	0	337	0	0	0	0	0	0	0	0
Bacteria;__Proteobacteria;__Gammaproteobacteria;__Pasteurellales;__Pasteurellaceae	0	0	4	1	9	0	2	0	18	2	3	2	18	1	2	4	355	36	0	0	31	1	0	10	5	1	1	2	4	0	0	36	20	0	2	6	0	0	1	2	3	0	0
Bacteria;__Candidate_division_OD1;__c;__o;__f	0	0	10	1	23	35	0	0	0	0	0	0	0	0	0	0	154	96	133	1	1	0	0	0	5	0	2	0	2	0	9	4	5	21	53	3	1	0	0	1	0	6	0
Bacteria;__Bacteroidetes;__Bacteroidia;__Bacteroidales;__Porphyromonadaceae	0	7	0	2	18	13	7	3	12	1	4	24	0	10	3	10	19	17	21	0	12	5	0	35	90	1	58	13	1	36	20	9	10	5	13	2	2	3	20	12	1	8	0
Bacteria;__Proteobacteria;__Alphaproteobacteria;__Rhizobiales;__Bradyrhizobiaceae	1	97	0	0	45	9	12	4	0	0	1	2	4	15	0	6	1	0	26	12	3	7	9	5	9	22	33	41	4	3	1	8	35	14	13	3	20	11	13	12	21	0	1
Bacteria;__Firmicutes;__Clostridia;__Clostridiales;__Ruminococcaceae	0	2	1	3	1	3	5	7	5	6	15	1	1	28	0	0	0	2	5	0	1	1	0	3	4	0	129	2	0	6	7	251	17	0	0	0	0	0	0	0	0	0	0
Bacteria;__Tenericutes;__Mollicutes;__Entomoplasmatales;__Entomoplasmataceae	0	0	5	0	0	0	5	0	4	0	0	0	0	0	0	0	0	0	0	0	0	4	1	1	386	24	2	7	0	0	13	0	0	0	0	1	0	0	0	17	0	0	0
Bacteria;__Proteobacteria;__Alphaproteobacteria;__Rhizobiales;__Xanthobacteraceae	0	0	0	0	4	0	106	19	3	4	1	3	2	8	0	1	0	1	0	16	5	82	5	3	1	10	10	35	1	0	2	3	5	0	14	11	14	5	47	37	10	0	1
Bacteria;__Actinobacteria;__Actinobacteria;__Propionibacteriales;__Nocardioidaceae	0	20	2	0	10	2	3	0	2	1	0	0	0	23	0	1	1	9	187	0	0	2	4	3	30	6	11	7	0	0	0	2	1	51	47	8	0	0	3	3	0	1	0
Bacteria;__Verrucomicrobia;__Verrucomicrobiae;__Verrucomicrobiales;__Verrucomicrobiaceae	0	274	1	0	6	0	3	0	0	0	2	2	0	11	0	18	49	1	4	1	0	3	6	4	4	2	3	2	0	0	2	9	4	0	3	1	15	7	0	3	0	0	0
Bacteria;__Firmicutes;__Bacilli;__Lactobacillales;__Enterococcaceae	2	1	4	0	4	21	3	19	2	0	0	0	2	2	0	19	155	17	3	0	0	2	0	1	14	5	4	4	1	11	12	1	0	0	13	45	0	8	0	0	0	6	0
Bacteria;__Proteobacteria;__Alphaproteobacteria;__Sphingomonadales;Other	0	23	0	2	34	2	1	0	0	0	0	0	0	2	0	124	2	0	7	11	4	2	53	20	11	6	0	1	0	6	6	0	0	0	0	0	30	5	1	25	0	2	0
Bacteria;__Firmicutes;__Bacilli;__Lactobacillales;__Leuconostocaceae	3	0	19	8	19	0	4	111	1	1	3	6	97	2	0	1	17	13	9	2	1	0	3	15	11	1	0	0	0	7	3	6	2	0	6	0	2	0	1	2	1	0	0
Bacteria;__Proteobacteria;__Gammaproteobacteria;__Oceanospirillales;__Oceanospirillaceae	0	0	0	0	1	2	0	1	1	0	0	0	2	0	11	269	4	5	0	8	6	11	1	18	3	1	0	1	0	2	0	0	0	0	0	3	6	1	4	3	0	0	0
Bacteria;__Actinobacteria;__Actinobacteria;__Corynebacteriales;__Tsukamurellaceae	0	24	4	2	59	6	9	0	0	0	2	0	2	10	0	4	0	6	45	1	1	9	7	6	12	0	2	7	1	0	55	1	4	25	43	1	0	0	4	0	0	1	0
Bacteria;__Bacteroidetes;__Sphingobacteriia;__Sphingobacteriales;__env.OPS_17	0	0	3	2	11	7	0	0	5	0	1	0	5	8	0	2	8	2	12	0	0	0	0	2	0	2	0	1	1	0	0	0	255	0	0	0	0	3	0	0	0	0	0
Bacteria;__Actinobacteria;__Actinobacteria;__Corynebacteriales;__Corynebacteriaceae	0	0	0	0	54	14	0	11	14	1	2	4	4	2	1	10	15	1	24	1	3	9	2	7	9	2	0	3	2	39	27	10	4	0	7	1	1	1	3	17	1	22	0
Bacteria;__Proteobacteria;__Alphaproteobacteria;Other;Other	0	0	1	0	5	1	69	1	0	0	0	0	0	1	0	2	10	2	1	3	1	1	3	1	43	0	9	2	0	0	66	0	0	0	2	2	0	0	0	9	79	0	1
Bacteria;__Proteobacteria;__Epsilonproteobacteria;__Campylobacterales;__Campylobacteraceae	0	1	3	0	0	0	3	1	26	0	1	0	3	1	6	6	55	1	11	0	16	16	0	28	62	4	25	8	0	11	0	0	2	0	1	6	0	7	0	6	0	0	0
Bacteria;__Proteobacteria;__Alphaproteobacteria;__Rickettsiales;__Family_Incertae_Sedis	0	277	0	0	0	0	0	0	0	0	0	0	0	0	0	0	0	9	1	0	0	0	0	1	0	0	0	0	0	0	16	0	0	0	0	1	0	0	0	4	1	0	0
Bacteria;__Spirochaetae;__Spirochaetes;__Spirochaetales;__Spirochaetaceae	0	0	0	0	3	1	44	1	18	0	2	0	0	1	0	0	4	5	16	1	0	5	0	0	82	25	1	6	0	3	37	0	0	5	2	7	9	0	1	3	0	0	0
Bacteria;__Proteobacteria;__Deltaproteobacteria;__Bdellovibrionales;__Bacteriovoracaceae	1	5	0	1	0	0	5	0	2	0	0	0	2	13	0	41	2	1	26	1	1	4	3	22	5	1	10	2	0	0	23	5	48	2	10	0	30	0	0	7	0	0	0
Bacteria;__Firmicutes;__Bacilli;__Bacillales;__Paenibacillaceae	3	4	0	0	0	0	0	1	1	0	0	1	0	0	0	0	0	0	0	0	0	0	1	114	4	116	2	0	0	0	0	2	0	0	1	1	4	0	1	5	0	2	0
Bacteria;__Proteobacteria;__Gammaproteobacteria;__Xanthomonadales;__Solimonadaceae	0	258	0	0	1	0	0	0	0	0	0	0	0	0	0	0	0	2	0	0	0	0	1	0	0	0	0	0	0	0	0	0	0	0	0	0	0	0	0	0	0	0	0
Bacteria;__Proteobacteria;__Deltaproteobacteria;__Myxococcales;Other	0	1	0	0	13	7	70	34	0	0	3	0	1	11	0	0	0	0	0	0	0	3	1	2	1	3	9	70	0	0	0	2	0	2	2	0	0	4	3	3	0	0	0
Bacteria;__Firmicutes;__Bacilli;__Bacillales;__Bacillaceae	9	39	0	0	2	5	0	0	1	0	0	1	7	8	69	1	1	0	6	1	0	7	1	1	0	0	0	1	3	18	2	7	8	0	10	2	4	0	2	3	0	18	0
Bacteria;__Fusobacteria;__Fusobacteriia;__Fusobacteriales;__Fusobacteriaceae	0	1	0	0	0	4	0	0	6	0	0	0	1	3	1	1	122	7	0	1	12	1	0	0	0	1	0	0	9	59	0	0	0	0	0	0	1	0	0	1	3	0	1
Bacteria;__BD1-5;__c;__o;__f	0	1	2	0	4	3	3	0	3	0	0	0	0	53	0	1	8	6	14	3	0	1	0	0	0	0	51	0	0	2	0	46	9	0	7	4	0	0	0	11	0	0	0
Bacteria;__Cyanobacteria;__ML635J-21;__o;__f	0	1	1	0	1	0	24	4	0	0	0	0	0	2	0	1	0	0	0	6	1	18	0	1	0	0	85	29	0	0	5	0	2	0	0	2	1	8	30	6	0	0	0
Bacteria;__Proteobacteria;__Alphaproteobacteria;__Rhizobiales;__Methylocystaceae	0	19	0	1	13	0	9	0	3	0	1	1	0	8	0	2	0	0	1	1	1	8	1	2	24	2	51	6	0	0	20	7	2	0	2	18	2	3	2	7	0	0	0
Bacteria;__Proteobacteria;__Betaproteobacteria;Other;Other	0	2	2	0	6	6	0	17	0	0	0	0	0	0	4	0	67	22	0	0	17	1	0	2	7	0	0	0	1	4	35	0	1	0	0	0	0	3	0	0	0	0	0
Bacteria;__Actinobacteria;__Actinobacteria;__Actinomycetales;__Actinomycetaceae	0	0	1	1	0	1	0	0	1	0	0	7	7	0	2	1	3	8	3	1	9	2	2	7	7	2	11	11	0	55	0	15	8	0	0	4	0	0	0	5	2	0	0
Bacteria;__Tenericutes;__Mollicutes;__Mycoplasmatales;__Mycoplasmataceae	0	0	9	0	1	0	0	1	22	0	1	1	3	22	0	1	0	0	1	4	9	18	3	0	8	5	12	4	2	1	0	4	0	0	2	9	1	1	1	24	1	0	0
Bacteria;__Planctomycetes;__Planctomycetacia;__Planctomycetales;__Planctomycetaceae	0	35	14	0	1	0	0	0	0	2	0	0	0	0	0	6	34	5	3	0	0	0	3	9	1	3	1	1	6	3	0	12	1	3	16	1	0	0	1	0	0	0	0
Bacteria;__Proteobacteria;__Gammaproteobacteria;__Chromatiales;__Chromatiaceae	0	0	0	0	0	1	5	12	3	1	0	0	0	26	0	0	0	0	0	0	0	0	0	0	6	0	7	34	0	0	0	6	51	0	0	0	0	0	0	0	0	1	0
Bacteria;__Proteobacteria;__Epsilonproteobacteria;__Campylobacterales;__Helicobacteraceae	0	0	5	1	7	1	1	1	1	0	2	3	0	0	1	0	62	13	10	1	3	5	3	0	0	2	5	6	0	1	0	0	1	0	5	2	2	0	3	1	1	0	0
Bacteria;__Candidate_division_SR1;__c;__o;__f	0	0	3	0	3	3	0	0	0	0	0	0	0	0	0	0	14	1	7	0	0	2	0	3	5	1	70	2	1	0	0	0	10	1	1	10	0	0	0	1	0	0	0
Bacteria;__Actinobacteria;__Actinobacteria;__Corynebacteriales;__Segniliparaceae	0	0	10	12	7	1	5	1	2	7	45	0	0	1	0	0	6	5	0	0	0	0	0	1	0	0	0	0	0	0	0	0	0	15	15	0	0	0	0	0	0	0	0
